# Supplementary material for: Variants in Maternal Effect Genes and Relaxed Imprinting Control in a Special Placental Mesenchymal Dysplasia Case with Mild Trophoblast Hyperplasia
Source: MDPI journal article supplement (doi:10.3390/biomedicines9050544), 2021-05-13
Supplement: s1 [file s1]

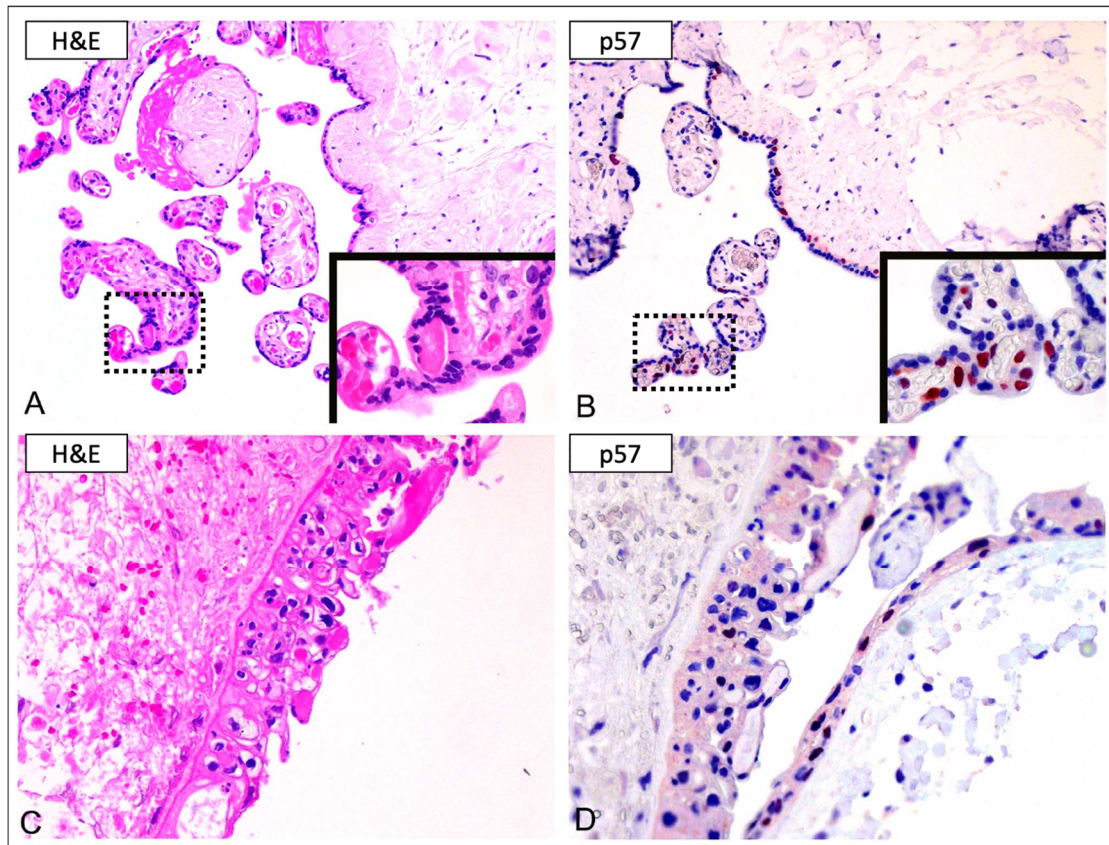

**Figure S1. Positive expression of the normally maternally expressed p57 excludes the possibility of the presence of complete androgenic tissue in the hydropic villi.** (A-B) Both hydropic villi (100X and inset, 400X). C-D) Enlarged villi were positive for p57 (cyclin-dependent kinase inhibitor 1C) staining in the nuclei (200X).

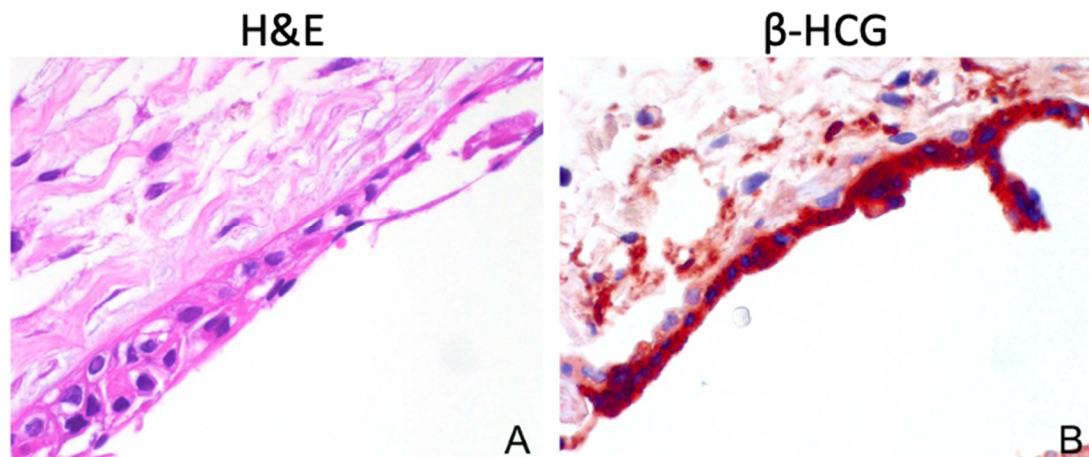

**Figure S2. Significant  $\beta$ -HCG expression in hyperplastic cytotrophoblasts.**

(A) H&E staining of hyperplastic trophoblasts (most are cytotrophoblasts, 400X). (B)

Hyperplastic trophoblasts are positive for  $\beta$ -HCG (human chorionic gonadotropin  $\beta$ -subunit) (hematoxylin stain, 400X). Microscopic (histological) descriptions: Cytotrophoblasts: small, round mononuclear cells with distinct cell borders, minimal clear or eosinophilic cytoplasm and single vesicular nuclei; Syncytial trophoblasts: multinucleated giant cells with abundant eosinophilic or basophilic cytoplasm, often with multiple intracytoplasmic vacuoles and dense pyknotic nuclei.

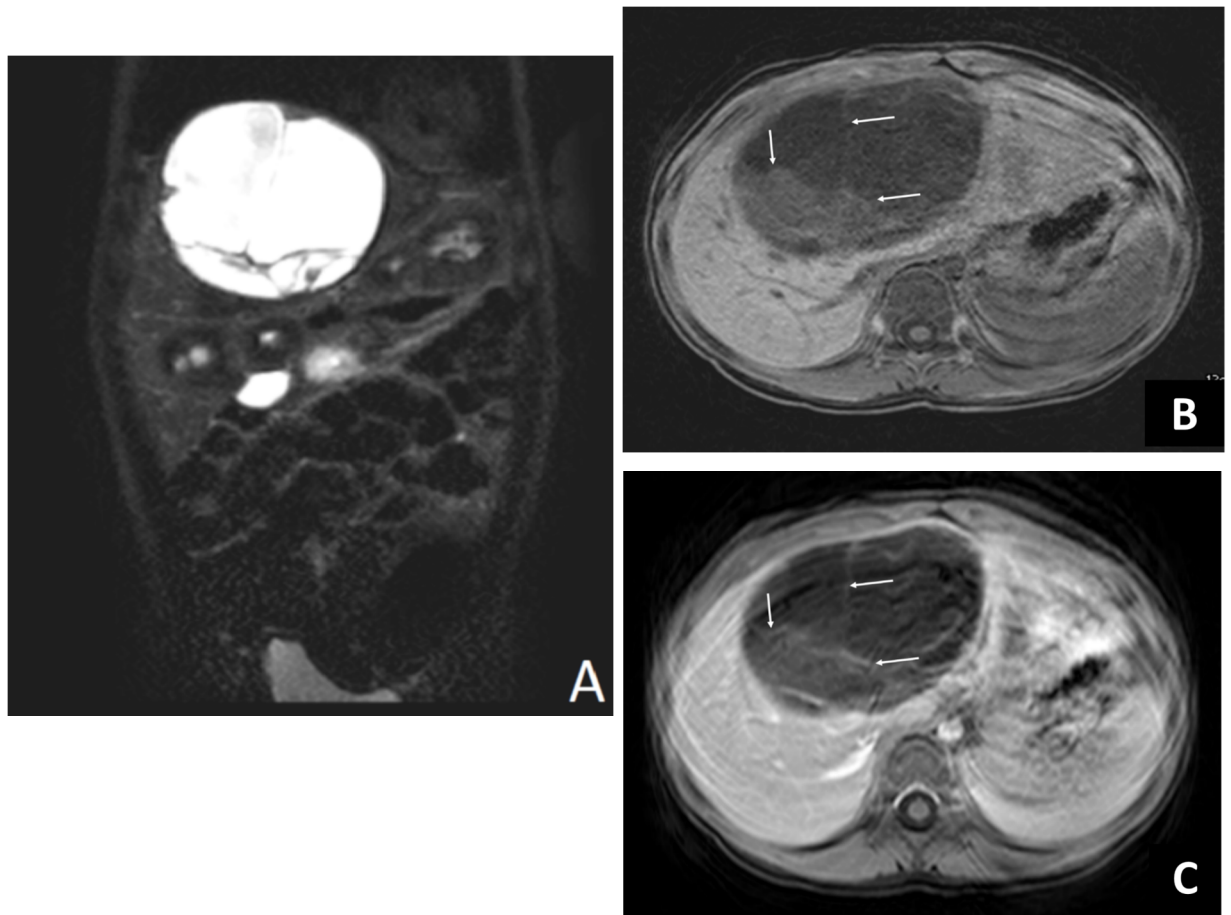

**Figure S3. The presence of mesenchymal hamartoma in the living baby.**

(A) Abdominal MRI coronal T2WI with fat suppression revealed multiple hepatic cystic nodules and masses compatible with the image pattern of a mesenchymal hamartoma. (B-C) Abdominal MRI axial images, including T1WI and contrast-enhanced T1WI at the level of a large hepatic mass, showed most cystic components and some enhancing inner septae (white arrows).

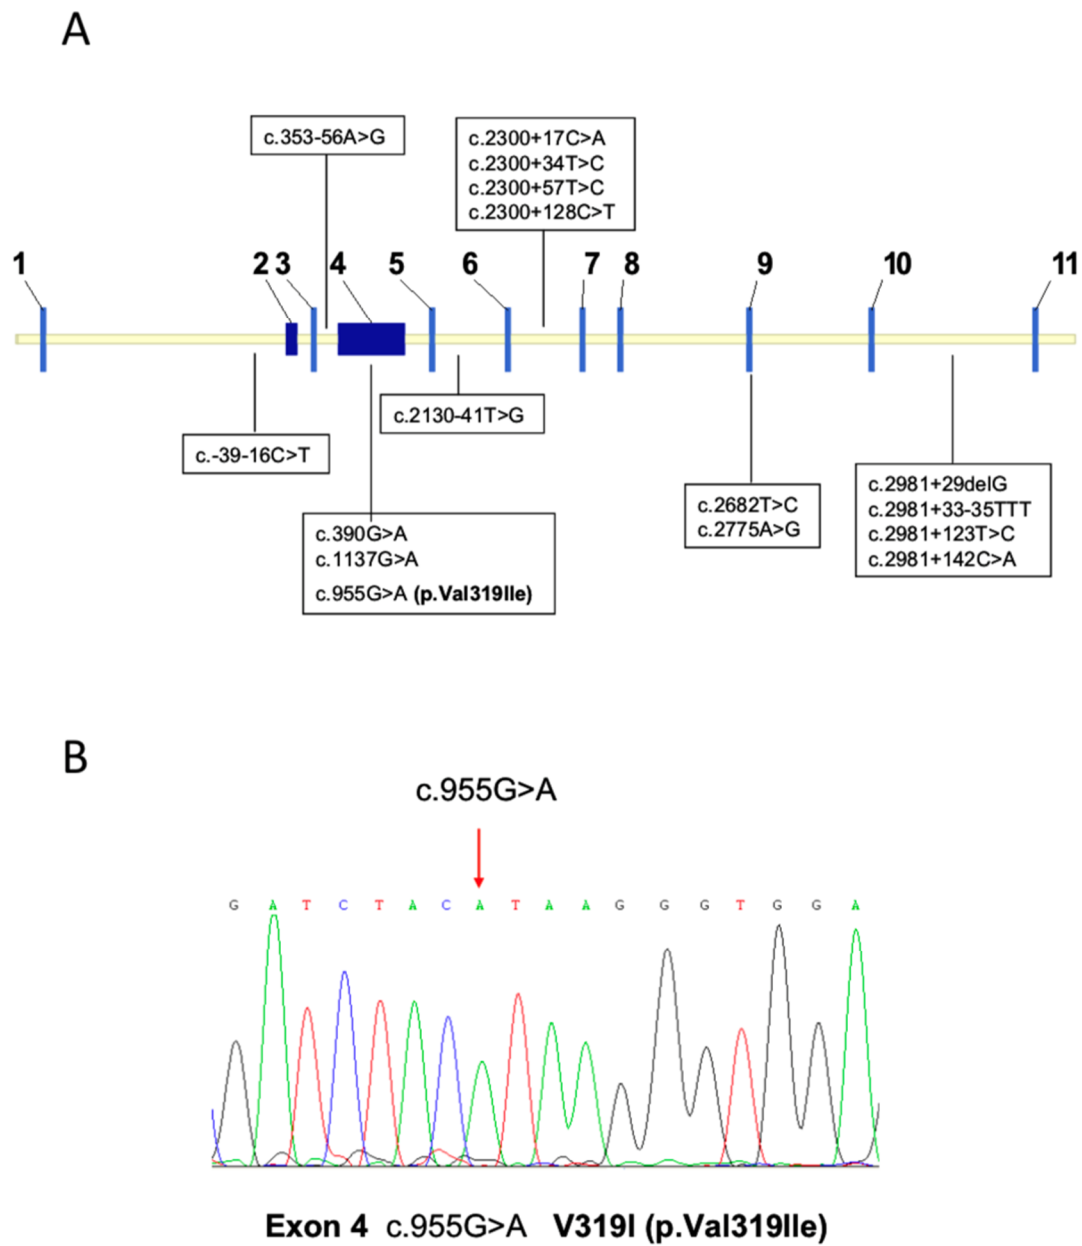

**Figure S4. Identification of a nonsynonymous variant in NLRP7.**

**(A)** Schematic representation of NLRP7 (NACHT, LRR and PYD domain-containing protein 7) mutations/variants identified in the patient compared to NC\_000019.8. **(B)** Missense mutation c.955G>A in exon 4, resulting in an amino acid change from valine to isoleucine.

## Supplemental Table I

### Bisulfite sequencing primer list

| Primer name | Accession number | Primer sequence (5'→3')                                                 | Band size (bp) | Tm | Reference   |
|-------------|------------------|-------------------------------------------------------------------------|----------------|----|-------------|
| KvDMR       | AJ006345         | F-TGATGTGTTTATTATTTYGGGG<br>R-CCCTAAAATCCCAAATCCTC                      | 304            | 55 | [1]         |
| ZIM2/PEG3   | AC006115         | F-AAAAGGTATTAATTATTTATAGTTTGGT<br>R-AAAAATATCCACCCTAAACTAATAA           | 322            | 53 | [2]         |
| SNRPN       | AC009696         | F-GGTTTTTTTTTATTGTAATAGTGTTGTGGGG<br>R-CTCCAAAACAAAAAACTTTAAAACCCAAATTC | 409            | 51 | [2]         |
| SNRPN       | AC009696         | F-AGGTTTTTTTTTATTGTAATAGTGTTGTGGGG<br>R-TCCAAAACAAAAAACTTTAAAACCCAAATTC | 355            | 67 | [3]         |
| PEG10       | AC069292         | F- GTGTTATGTTTTATAAATAGATAAG<br>R- AACTCATATACCTCTACAATTC               | 375            | 53 | [4]         |
| H19         | AF087017         | F-TGTATAGTATATGGGTATTTTTGGAGGTTT<br>R-TCCTATAAATATCCTATTCCCAAATAACC     | 231            | 54 | [2]         |
| GNAS1-1A    | AL121917         | F-TTTTGTTTTTTTTTYGTTTGTTTAT<br>R-ACAACTTCRACAACCACCTCRACAAC             | 219            | 55 | [2]         |
| GNAS1-AS    | AL121917         | F- AATTGTGGTATGAGGAAGAGTGAT<br>R- TCAACCATTAACAAAAATCATACC              | 235            | 58 | Self-design |
| GNAS1-XLαs  | AL121917         | F-AGGTTTGTAAGGTTGTTTTAGAG<br>R- AAATCTCCATCCAAAACTACTACC                | 298            | 51 | Self-design |
| NESP55      | AL12191          | F-TTTTTGTAGAGTTAGAGGGTAGGT                                              | 343            | 55 | [2]         |

|                   |               |                                                                 |     |    |     |
|-------------------|---------------|-----------------------------------------------------------------|-----|----|-----|
|                   | 7             | R-AAATAAAACAACCTCAAAATCTACC                                     |     |    |     |
| IGDMR<br>(CG4)    | NT_0264<br>37 | F- TTTTATTATTGAATTGGGTTTGTTAGT<br>R- ACAATTCCTACTACAAAATTTCAACA | 311 | 57 | [5] |
| GTL2-DMR<br>(CG7) | NT_0264<br>37 | F- TTGTGTTTGAATTTATTTTGTTT<br>R- CCCCAAATTCTATAACAAATTACT       | 168 | 55 | [5] |

PCR program:

95: 5 min--(95: 30 sec--X: 45 sec--72: 1 min) ×40--72: 10 min—4

**Supplemental Table II Genomic DNA sequencing primers**

| Primer name | Region | Primer sequence (5'→3')                        | Band size (bp) |
|-------------|--------|------------------------------------------------|----------------|
| NLRP2       | Exon1  | CACTGCTAACTTATTTTTCAT<br>TGGCCTTCTGAATTTCTAAA  | 556            |
|             | Exon2  | GGAGATAAGAGAAAGGAACAA<br>CCAGATCTCACATGAAGAATA | 208            |
|             | Exon3  | CTAATCTAGGCTTCACTACT<br>TTCTTCCCTCTATTCTTACG   | 352            |
|             | Exon4  | CACATTTGTAGCTTATTTGC<br>ATAAATGCTTTGTGTTACATAG | 305            |
|             | Exon5A | CTCTCCCTTCCCTCCTCACC<br>GCTTGGGCTAGGATGTGTGG   | 406            |
|             | Exon5B | AGCTGGTCTTCAGGGACTGG<br>GCAGAGGAAACGCAGGAACA   | 524            |
|             | Exon5C | CTGCAGATGGAGAAGGGGGA<br>AGCGAGGCCAAAGGAGTAGT   | 456            |
|             | Exon5D | ACCCTGGAGAAGGAGGAGGA<br>TAAGGGGGCATGGGATGAGG   | 544            |
|             | Exon6  | CAGCCGTGATGGACACACAT<br>GGACAGGACTCTCTCAATTCCC | 357            |
|             | Exon7  | CGAGCCCCTGGTTTCCATTT<br>CTGCATCCTGGGTCATCTGC   | 378            |
| Primer      | Region | Primer sequence (5'→3')                        | Band size      |

| name  |        |                                                    | (bp) |
|-------|--------|----------------------------------------------------|------|
| NLRP2 | Exon8  | ACGTGGTCCTATTTCTCCCACA<br>TCAGGCATGACCATTGCTCG     | 267  |
|       | Exon9  | GCTAGCCGGGAAGGTTGAAG<br>ACCCTACTCAAACCCGGAGG       | 306  |
|       | Exon10 | ACTCACAGGTTCTGGGTTTGC<br>GGGAAGTCGGCTTCACTGAT      | 302  |
|       | Exon11 | GCACTGGCTGCATTAACTG<br>CAGTCTCCTACAGCAGGTCCA       | 300  |
|       | Exon12 | CAGGAAAGGTGACCCATGCC<br>TCTTTTCTCTAACTTGTCAAAGCCCA | 538  |

PCR program: 95: 5 min--(95: 30 sec--55: 45 sec--72: 1 min) ×35--72: 10 min—4

1. Monk, D.; Arnaud, P.; Apostolidou, S.; Hills, F.A.; Kelsey, G.; Stanier, P.; Feil, R.; Moore, G.E. Limited evolutionary conservation of imprinting in the human placenta. *Proc Natl Acad Sci U S A* **2006**, *103*, 6623-6628, doi:10.1073/pnas.0511031103.
2. Judson, H.; Hayward, B.E.; Sheridan, E.; Bonthron, D.T. A global disorder of imprinting in the human female germ line. *Nature* **2002**, *416*, 539-542, doi:10.1038/416539a.
3. El-Maarri, O.; Seoud, M.; Coullin, P.; Herbiniaux, U.; Oldenburg, J.; Rouleau, G.; Slim, R. Maternal alleles acquiring paternal methylation patterns in biparental complete hydatidiform moles. *Hum Mol Genet* **2003**, *12*, 1405-1413, doi:10.1093/hmg/ddg152.
4. Monk, D.; Wagschal, A.; Arnaud, P.; Muller, P.S.; Parker-Katiraei, L.; Bourc'h, D.; Scherer, S.W.; Feil, R.; Stanier, P.; Moore, G.E. Comparative analysis of human chromosome 7q21 and mouse proximal chromosome 6 reveals a placental-specific imprinted gene, TFPI2/Tfpi2, which requires EHMT2 and EED for allelic-silencing. *Genome Res* **2008**, *18*, 1270-1281, doi:10.1101/gr.077115.108.

5. Kagami, M.; Sekita, Y.; Nishimura, G.; Irie, M.; Kato, F.; Okada, M.; Yamamori, S.; Kishimoto, H.; Nakayama, M.; Tanaka, Y.; et al. Deletions and epimutations affecting the human 14q32.2 imprinted region in individuals with paternal and maternal upd(14)-like phenotypes. *Nat Genet* **2008**, *40*, 237-242, doi:ng.2007.56 [pii]  
10.1038/ng.2007.56.
